# Supplementary material
Source: PubMed Central journal article supplement (PMC3837945)
Supplement: JB.00760-13_zjb999092904so1.pdf [file JB.00760-13_zjb999092904so1.pdf]

## Supplemental material

**TABLE S1** Oligonucleotides used in this work

|                    |                                       |
|--------------------|---------------------------------------|
| RSP0035B           | 5' CGGAATTCGTGACCCCGAAAGGCAGCGAC 3'   |
| ORF12              | 5' GCTCTAGACGTTTCAGCGCCTCCACATGG 3'   |
| pRK6086 F          | 5' CGTCTAGAGTCACGCCGAAGGGCAGCGAC 3'   |
| pRK6086 R          | 5' GCGAATTCCGTTTCAGCGCCTCCACATGG 3'   |
| pBADmyc6086SPS-fw  | 5' TAGAATTCGACAGCCCGCCGTC 3'          |
| pBADmyc6086SPS-rv  | 5' ATAAGCTTCCGGCCGGTCTCCA 3'          |
| 6086DHFw           | 5' CGGAATTCGCCGTCCGGGTCGAGGCCGA 3'    |
| 6086DHRV           | 5' CGCTGCAGGCCGGCCGGTCTCCACGAACTGC 3' |
| GAD6086Rv          | 5' ATCCCGGGGCCGGCCGGTCTCCACGA 3'      |
| DH67CoilF          | 5' GAATTCGCTCGGTCGCCGATCTGCGCGA 3'    |
| pG67FCOOH          | 5' GAATTCACCGAGCTCGGCGAGGCCATCG 3'    |
| RSP0067-GSTRvsSTOP | 5' CCCGGGTCACGGATAACGGATCGGATTG 3'    |
| ADBDmotB1          | 5' GCGAATTCTCGTTTCAGCAAGATGGCGGGG 3'  |
| ADmotB2            | 5' GCGAGCTCTCAGTCCTTGTAGGAAATCTC 3'   |

```

R.spha/1-361      1 VRRLL LLL LAL - - - LAPLAASADSPAVRV EAEGFAMVAGPGDRDAARRRAVSDALLA 55
Va/1-377         1 MKKILNSLFSITLVMLVLPFKVMA S - - - - WY E V T G V A T I V S S - - E E T A R L H A L E D A L F K 52

R.spha/1-361     56 AALAAGADVSGHTAVNRGIVTSDVAIVRSVGRILRHRILSETLSGATWRVRIEALVGE 113
Va/1-377         53 AVNFSGADI- GSI SNLMP LLEESRNEYQFTNHEVR Y - I L V E S E R K R R G K V E V K I R V D I 108

R.spha/1-361     110 G P G P L - C P V R T L I V T A Y P A T L A V D P H A P A W S G E L A R T I A E R L V E R L A L H P A A S L S R V A 170
Va/1-377         109 Y P S A T G C H - - - - - T D Q Y K K T I L V - - - - - - - G N I E V A S P Q Q A V M G Q I Y Q V G D D F S R V V 153

R.spha/1-361     171 E R R P T R L G R - - - - - G G E A F D Y Q S L T Q G S V R L P A N G H G - - - - - - - - - F L P T I R L R R V 212
Va/1-377         150 N R Q L D Q T S R S F V S V G T T D Y S I S S N Y P A R T Q M I A Q D N G A Q Y I I G G V I T D L T A T V E S Q L L 211

R.spha/1-361     213 A G P R L E L A L E L K L V A A D G T A S V Q Q F - - - - - V R R V P L P R P S L L G D L S V L V Q P Q R E A L A 260
Va/1-377         212 Q D D I I N R Q F A L E M K V F D G K T G H E V F N K A Y R E V A R W P F A K T S Q V D T R S A R F W A S - - T Y G 267

R.spha/1-361     265 S A L L E G S D R A L D A L F D R A G C E P A S A R L V A A - G G L L E V P V G Q A N G L T P G - - - - - S L A 310
Va/1-377         268 E M M L R V S R N I M L D L E S E L S C K I T L P E V V A V F G N T V T M D L G R M H G V K E G D K L Q L W H T A S 325

R.spha/1-361     315 F T A D G G - - - - - S T E I - L E I V A L R S G S A R L R P L D P T R P P A A F A G R R V Q F V E T G R      361
Va/1-377         326 F I D Q N G L P R N K V S Q S E I T L T V S R I Y E H E A E L T I D Q P N L A S S V Q I G D V M N K I L - - -      377

```

Suppl. Fig 1. Sequence alignment of FlgT from *Vibrio alginolyticus* with the gene product of RSP\_6086 (FlgT<sub>RS</sub>)

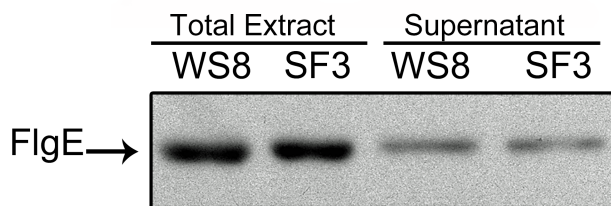

Suppl. Fig 2. Exponentially growing cultures of WS8 and FS3 were fractionated, and the supernatant and cell pellet were analyzed by Western blot using anti-FlgE antibodies.

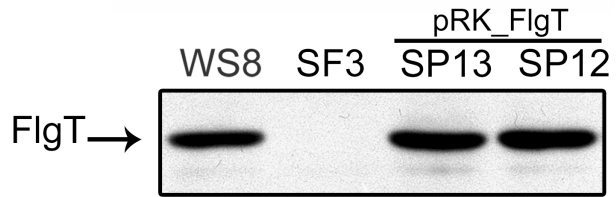

Suppl. Fig 3. Presence of FlgT in total cell extracts from SP13 ( $\Delta fleQ1::Kan$ ) and SP12 ( $\Delta fleT1::aadA$ ) strains expressing *flgT* from *lacp* present in pRK415. Total cell extracts from WS8 and SF3 were used as positive and negative controls, respectively.

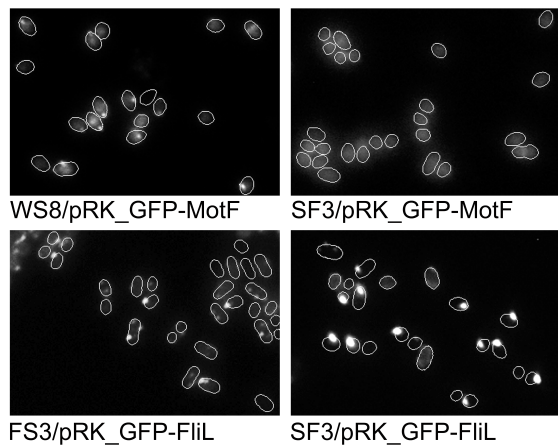

Suppl. Fig 4. GFP-MotF and GFP-FliL localization in SF3 strain. Representative images of GFP-MotF and GFP-FliL in WS8 and SF3 cells. Bar=1  $\mu m$ . Cell contours are shown.
